# Supplementary material for: Activation of lactate receptor HCAR1 down-modulates neuronal activity in rodent and human brain tissue
Source: PubMed Central journal article supplement (PMC9441721; doi:10.1177/0271678x221080324), 2022-03-03
Supplement: sj-pdf-1-jcb-10.1177_0271678X221080324.pdf [file sj-pdf-1-jcb-10.1177_0271678X221080324.pdf]

## Supplementary Information for

# Activation of lactate receptor HCAR1 down-modulates neuronal activity in rodent and human brain tissue

Marc Briquet <sup>1</sup>, Anne-Bérengère Rocher <sup>1</sup>, Maxime Alessandri <sup>1</sup>, Nadia Rosenberg <sup>1</sup>, Haissa de Castro Abrantes <sup>1</sup>, Joel Wellbourne-Wood <sup>1</sup>, Céline Schmuziger <sup>1</sup>, Vanessa Ginet <sup>1</sup>, Julien Puyal <sup>1</sup>, Etienne Pralong <sup>2</sup>, Roy Thomas Daniel <sup>2</sup>, Stefan Offermanns <sup>3</sup>, Jean-Yves Chatton<sup>1,4,\*</sup>

<sup>1</sup>Department of Fundamental Neurosciences, University of Lausanne, Switzerland; <sup>2</sup>Department of Neurosurgery Service, University Hospital of Lausanne and faculty of Biology and medicine, UNIL, Lausanne, Switzerland; <sup>3</sup>Max Planck Institute for Heart and Lung Research, Bad Nauheim, Germany; <sup>4</sup>Cellular Imaging Facility, University of Lausanne, 1005 Lausanne, Switzerland

## Supplementary Material and Methods

**Organotypic culture.** Organotypic hippocampal slice cultures were prepared from 3 day-old WT mice. After decapitation, brains were quickly removed and plunged into ice-cold filtered dissection medium containing 50% MEM, 1% Penicillin-Streptomycin (Invitrogen, catalog # 15140122) and 10 mM Tris (Merck-Millipore, catalog # 8382). The hippocampi were rapidly and carefully dissected out and put both on Teflon-disk in order to obtain 400 µm-thick transversal section using tissue-cutter (McIlwain Tissue Chopper, TC752). Slices were placed onto porous hydrophilic LCR membrane (Merck-Millipore, catalog # FHLC04700) in the Millicell-insert (Merck-Millipore, catalog # PICM03050), which were transferred into 35mm Petri dish. Each Petri dish contained 1mL of pre-warmed culture medium composed of filtered 50 % MEM, 25% horse serum (Invitrogen, catalog # 26050-047), 25% HBSS, 7.5% NaHCO<sub>3</sub>, 1% Penicillin-Streptomycin, 36mM D-Glucose and 5mM Tris, Petri dish containing the slices were incubated during 4 days at 36°C and then transferred into a 33°C incubator for the following weeks. Culture medium was first changed after 24h and then every 3-4 days. Widefield calcium imaging was performed with an upright epifluorescence microscope (FN1, Nikon, Tokyo, 163 Japan) using a 40X 0.8 N.A water-immersion objective lens. Fluorescence excitation wavelengths were selected using a fast filter wheel (Sutter Instr., Novato, CA) and fluorescence was detected using an Evolve EMCCD camera (Photometrics, Tucson, AZ, USA). Digital image acquisition and time series were computer-controlled using the Metafluor software (RRID:SCR\_014294)

**Supplementary Table 1. Summary of primers used for qRT-PCR in human and mouse brain experiments.**

|              |                |                        |                       |
|--------------|----------------|------------------------|-----------------------|
| <b>Human</b> | HCAR1          | GCCCAGCACTGTTTACCTTTTC | CCCCAAAAGCCCAGTGTCTAC |
|              | $\beta$ -actin | CTGTACGCCAACACAGTGCT   | GCTCAGGAGGAGCAATGATC  |
| <b>Mouse</b> | HCAR1          | GGGACTGTGTATCTTCTGA    | GAGTCTTGGTGTAGAATTTGG |
|              | GAPDH          | TCCATGACAACCTTTGGCATTG | CAGTCTTCTGGGTGGCAGTGA |

**Supplementary Table 2. HCAR1 activation did not affect passive properties of cortical human neurons and rodent GCs.**

|          | Human       |              | Mouse        |              | Rat         |              |
|----------|-------------|--------------|--------------|--------------|-------------|--------------|
|          | Baseline    | 3CI-HBA      | Baseline     | 3CI-HBA      | Baseline    | 3CI-HBA      |
| Rheobase | 351 ± 83.6  | 357.2 ± 71.4 | 52.2 ± 28.9  | 55.1 ± 31.6  | 92.9 ± 33.2 | 89.4 ± 41.4  |
| RMP      | -73.8 ± 3.2 | -74.4 ± 2.2  | -74.2 ± 11.5 | -70.6 ± 10.6 | -74.3 ± 4.7 | -74.5 ± 5    |
| $R_N$    | 68.2 ± 17.1 | 72.1 ± 12.2  | 235.9 ± 65.7 | 235.9 ± 56.6 | 207.8 ± 52  | 222.6 ± 59.8 |

All parameters were tested in all cells used for analysis. 3CI-HBA was applied at 40 $\mu$ M. Data are shown as means $\pm$ SD and analysis was done using one sample t-test. RMP, resting membrane potential;  $R_N$ , input resistance.

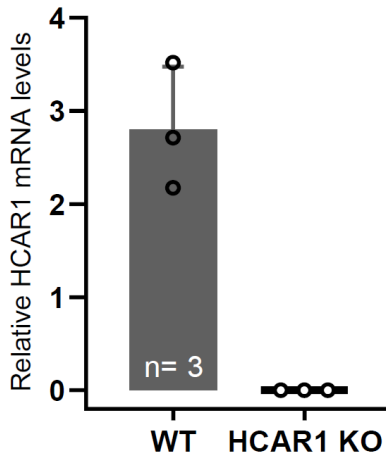

**Supplementary Figure 1.** HCAR1 mRNA detection in hemibrain after dissection of 1-month old mice. Results showed no expression of HCAR1 mRNA transcript in HCAR1 KO samples (WT:  $2.8 \pm 0.68$ ; KO: 0). Results are expressed relative to GAPDH expression as means  $\pm$  SD. The number of experiments are indicated in the graph.

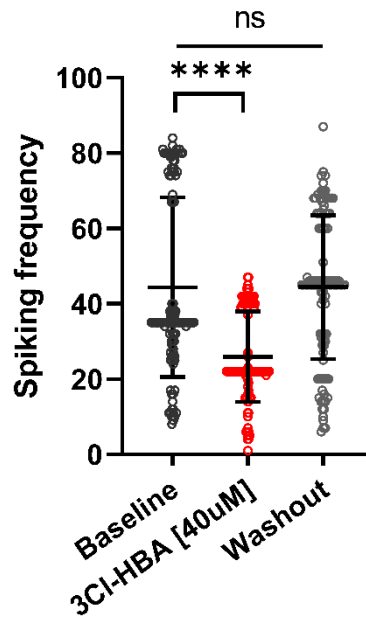

**Supplementary Figure 2.** Hippocampal neurons from mouse organotypic slices decrease their spiking frequency after activation of HCAR1. Summary graph of spontaneous calcium spiking activity down-modulated by HCAR1 activation by 3CI-HBA (40 $\mu$ M) in hippocampal neurons from WT mice (one-way ANOVA, n= 107 cells from 5 experiments, Baseline: mean = 44.41  $\pm$  23.87, 3CI-HBA: mean = 25.99  $\pm$  12, Washout: mean = 44.44  $\pm$  19.13,  $P < 0.0001$ ). The calcium spiking activity of individual cells is shown. Values are means  $\pm$  SD;  $P < 0.05$ , \*\* $P < 0.01$ , \*\*\*  $P < 0.001$ , \*\*\*\*  $P < 0.0001$  versus 3CI-HBA application and washout.
